# Supplementary material for: Manufacturing and Thermal Shock Characterization of Porous Yttria Stabilized Zirconia for Hydrogen Energy Systems
Source: MDPI journal article supplement (doi:10.3390/ceramics5030036), 2022-08-21
Supplement: s1 [file s1]

## Supplementary Information

### Manufacturing and Thermal Shock Characterization of Porous Yttria Stabilized Zirconia for Hydrogen Energy Systems

M Faisal Riyad, Mohammadreza Mahmoudi, and Majid Minary Jolandan\*

Mechanical and Aerospace Engineering, School for Engineering of Matter, Transport and Energy,  
Arizona State University, Tempe, AZ 85287, USA

\*Corresponding author email: majid.minary@asu.edu

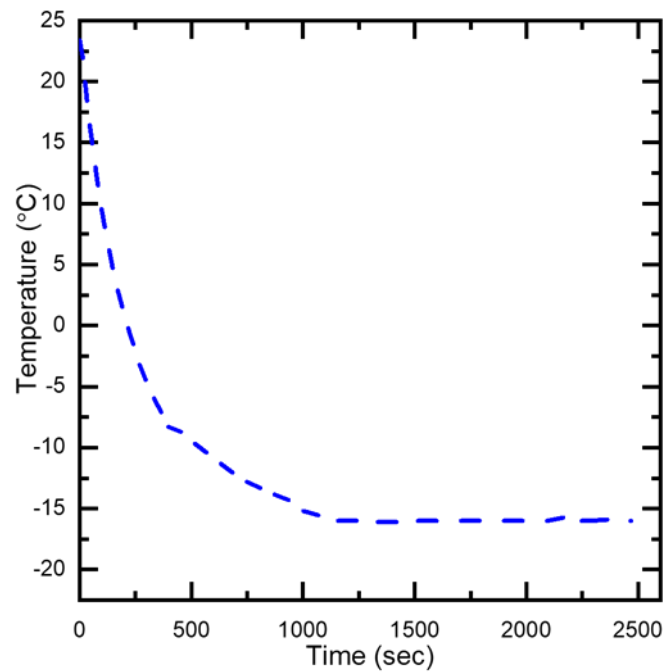

**Figure S1.** The temperature profile of the thermoelectric plate during freeze casting of YSZ slurry.

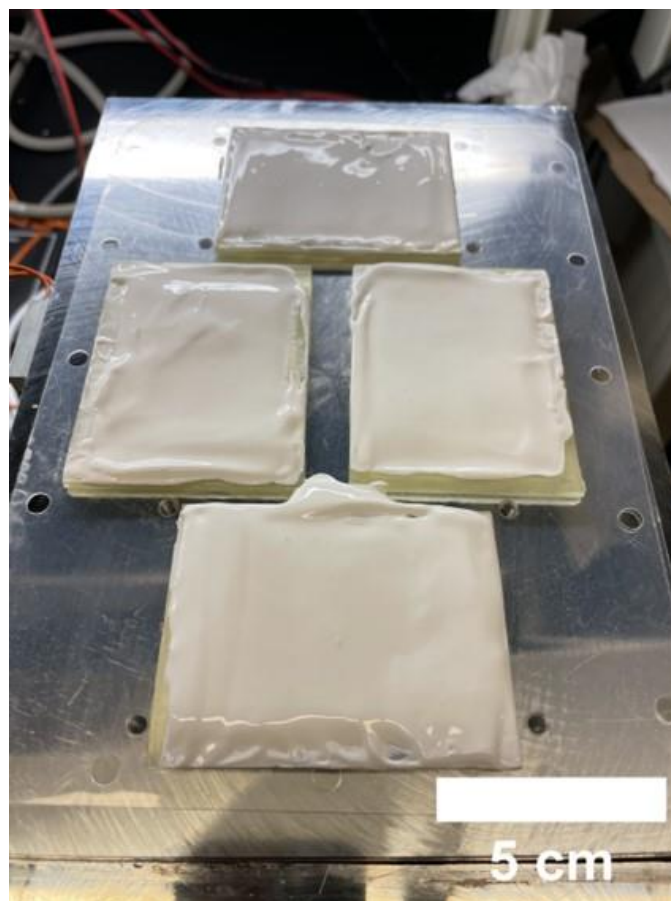

**Figure S2.** Freeze casting of YSZ slurry into molds on the surface of the thermoelectric cold plate.

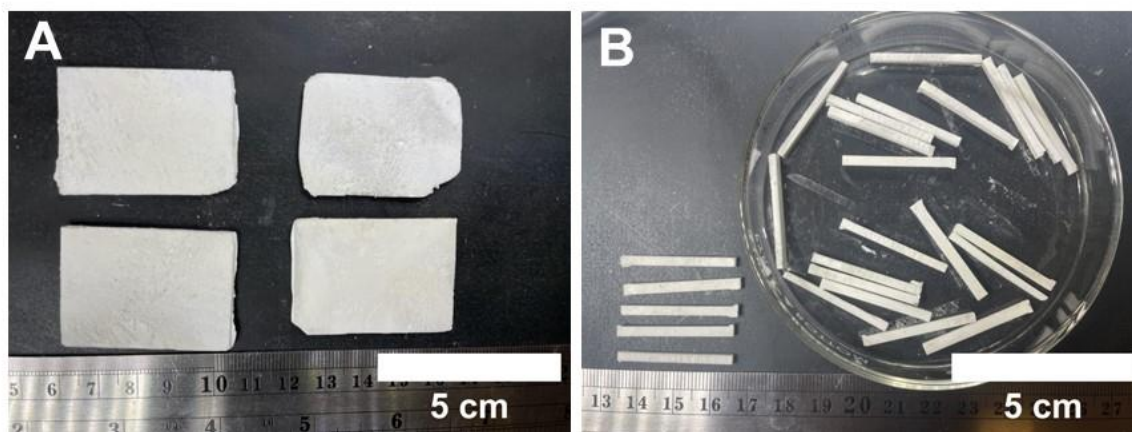

**Figure S3.** (A) Images of representative sintered YSZ sheets after polishing. (B) YSZ beams prepared from polished YSZ sheets for flexural test.

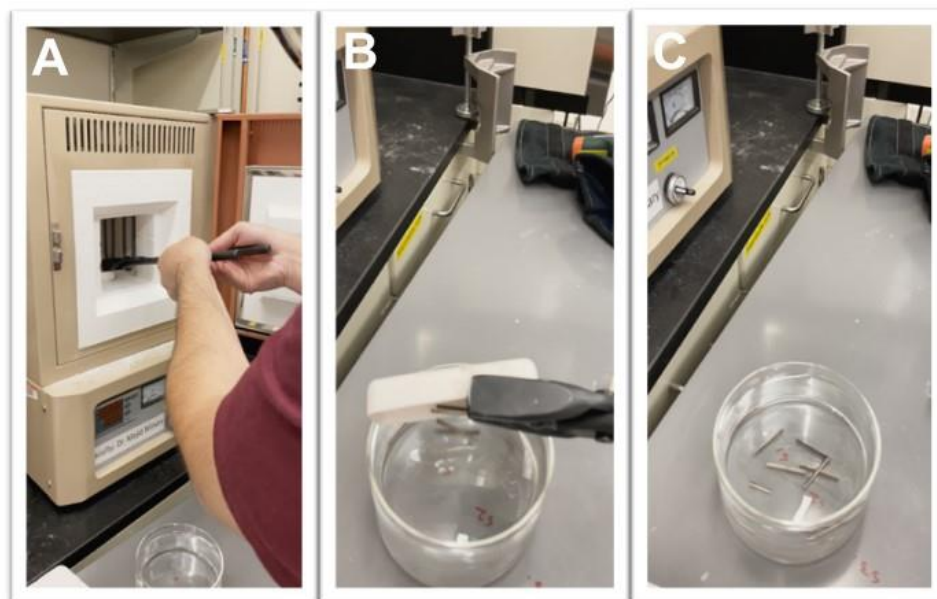

**Figure S4.** Thermal shock test. **(A)** Taking the beams from the furnace after thermal equilibrium at a desired temperature. **(B)** Quenching the heated beams in DI water. **(C)** Quenched beams in DI water.

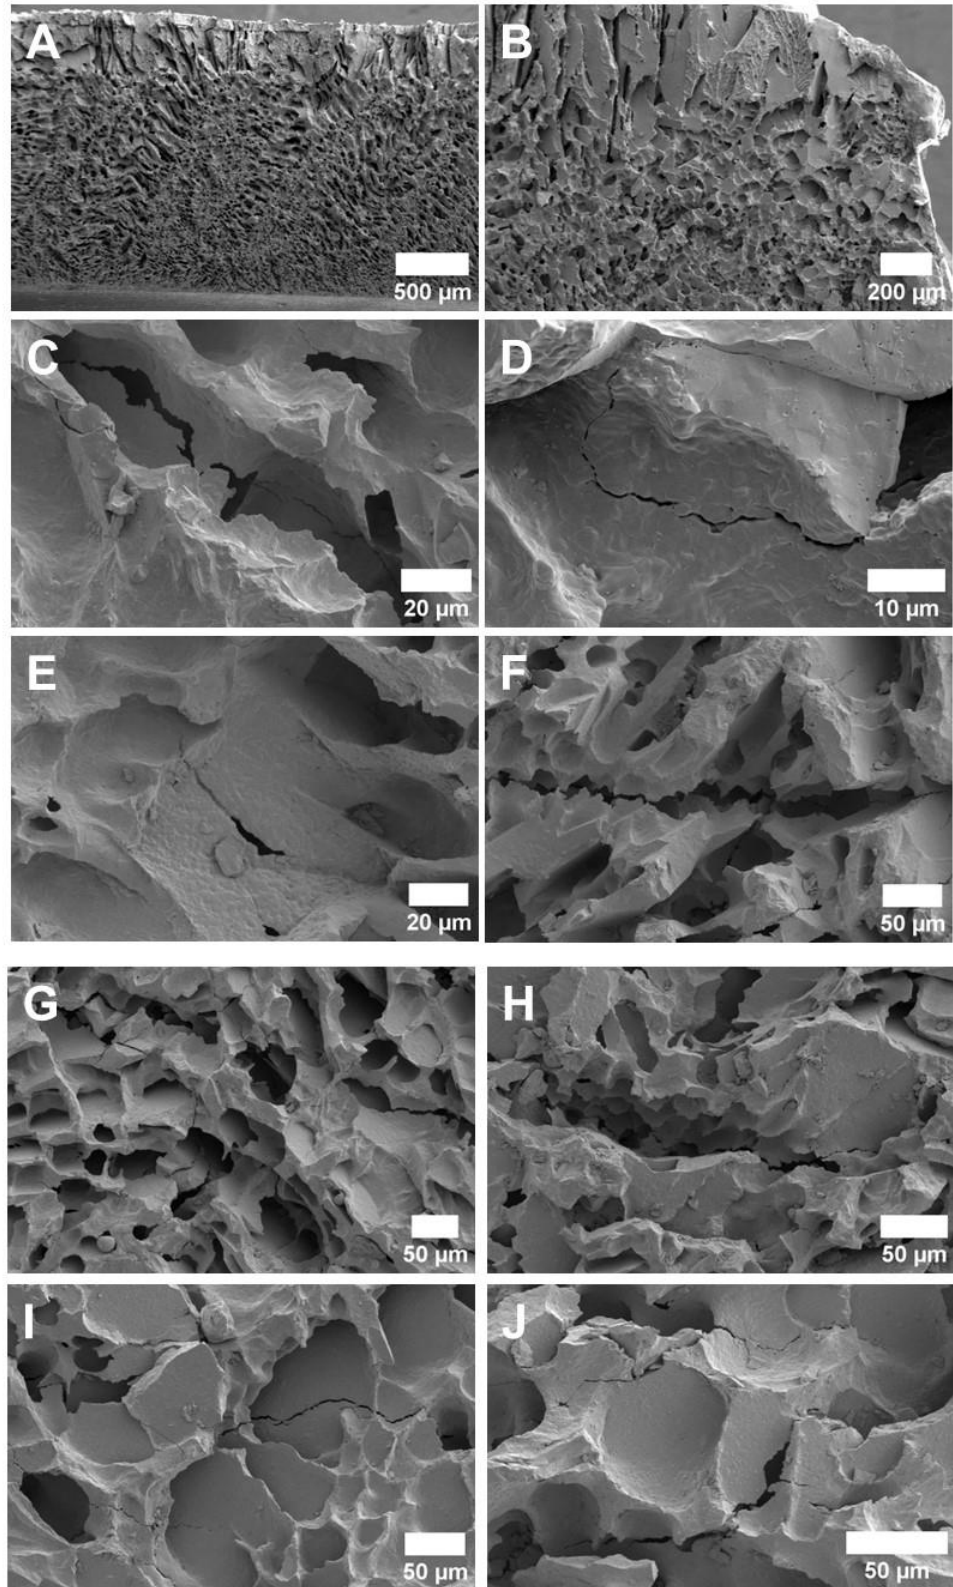

**Figure S5.** SEM micrograph of the surface of thermally shocked beams tested at temperatures (A) and (B) 200 °C (C) and (D) 300 °C (E) and (F) 400 °C and (G) - (J) 500 °C.

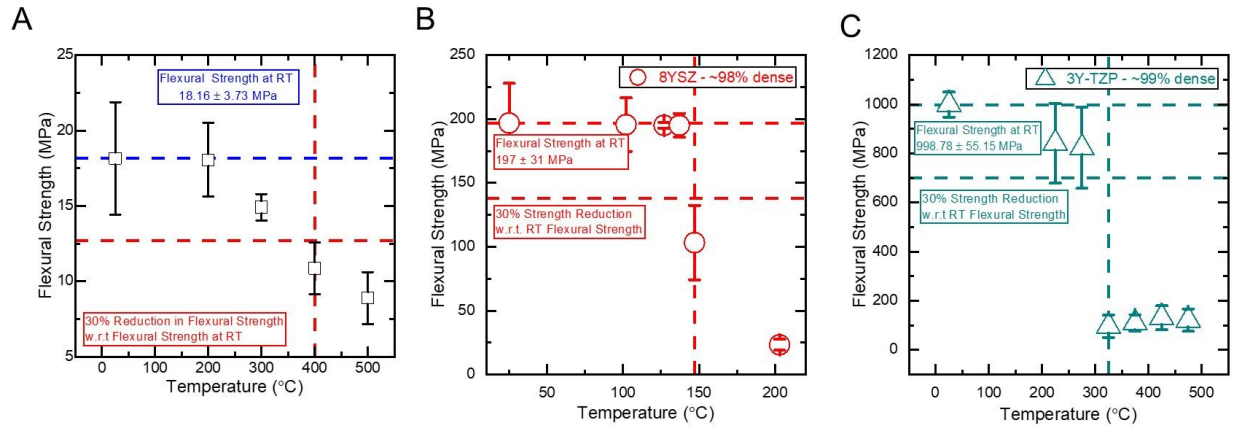

**Figure S6.** Comparison of flexural strength of (A) porous 8YSZ (this study), (B) dense 8YSZ and (C) 3Y-TZP at different temperatures. B and C are reproduced from [41,42].

## References

41. Angle, J.P.; Stepan, J.J.; Thompson, P.M.; McCartney, M.L. Parameters influencing thermal shock resistance and ionic conductivity of 8 mol% yttria-stabilized zirconia (8YSZ) with dispersed second phases of alumina or mullite. *J. Eur. Ceram. Soc.* **2014**, *34*, 4327–4336.
42. Sato, T.; Ishitsuka, M.; Shimada, M. Thermal shock resistance of ZrO<sub>2</sub> based ceramics. *Mater. Des.* **1988**, *9*, 204–212.
